# Supplementary material for: Deep learning models predict regulatory variants in pancreatic islets and refine type 2 diabetes association signals
Source: eLife journal article supplement (doi:10.7554/elife.51503), 2020-01-27
Supplement: supp [file elife-51503-supp-v1.zip]

Input layer:  
one-hot code matrix  
(1000 x 4)

|   |   |   |   |   |
|---|---|---|---|---|
| A | 1 | 0 | 0 | 0 |
| G | 0 | 0 | 1 | 0 |
| T | 0 | 0 | 0 | 1 |
| G | 0 | 0 | 1 | 0 |
| A | 1 | 0 | 0 | 0 |
| G | 0 | 0 | 1 | 0 |
| T | 0 | 0 | 0 | 1 |
| C | 0 | 1 | 0 | 0 |
| A | 1 | 0 | 0 | 0 |
| T | 0 | 0 | 0 | 1 |
| T | 0 | 0 | 0 | 1 |
| A | 1 | 0 | 0 | 0 |
| C | 0 | 1 | 0 | 0 |
| T | 0 | 0 | 0 | 1 |
| A | 1 | 0 | 0 | 0 |
| G | 0 | 0 | 1 | 0 |
| G | 0 | 0 | 1 | 0 |
| A | 1 | 0 | 0 | 0 |
| G | 0 | 0 | 1 | 0 |
| T | 0 | 0 | 0 | 1 |
|   | A | C | G | T |

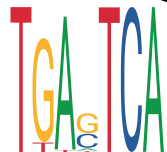

Convolution  
filter sizes:  
1<sup>st</sup> 7  
2<sup>nd</sup> 7  
3<sup>rd</sup> 7

Convolutional +  
pooling layers x3

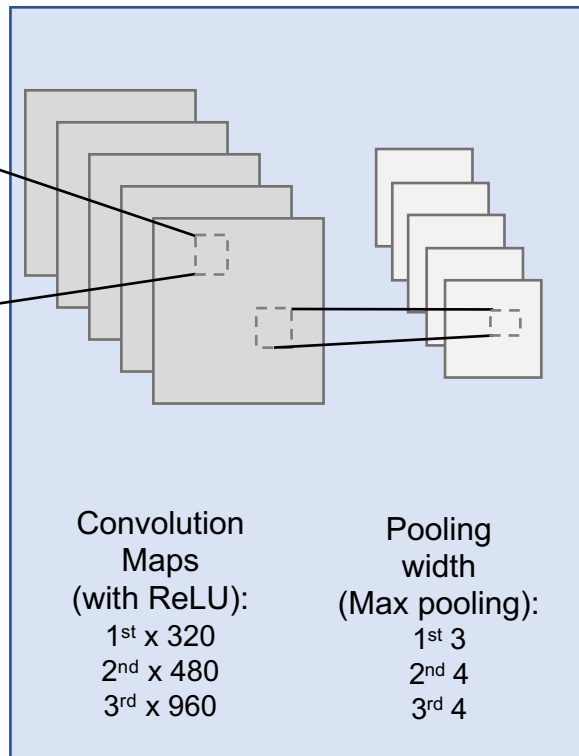

Fully connected  
hidden layers x2

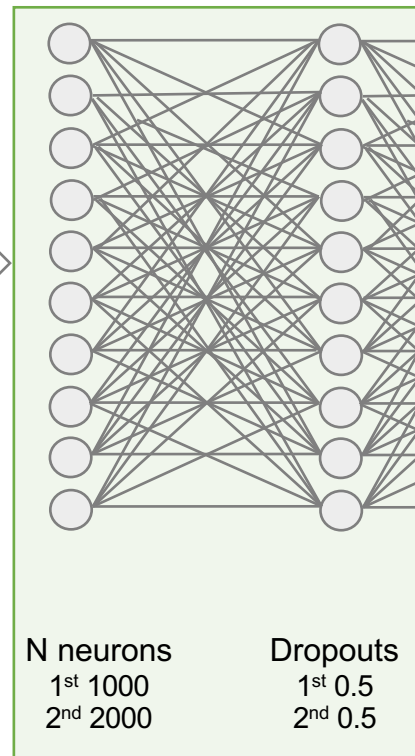

Multitask  
prediction layer

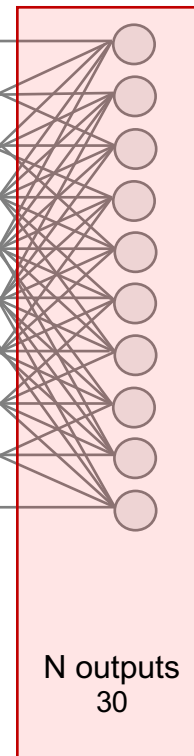

ATAC-seq  
CTCF  
DNase-seq  
FOXA2  
H2A.Z  
H2K4me1  
H2K4me2  
H3K27ac  
H3K27me3  
H3K36me3  
...
