# Supplementary material for: Deep learning models predict regulatory variants in pancreatic islets and refine type 2 diabetes association signals
Source: eLife. 2020 Jan 27;9:e51503. doi: 10.7554/eLife.51503 (PMC7007221; doi:10.7554/eLife.51503)
Supplement: Supplementary file 1. — (STable 1) Summary of publicly available datasets used to train the CNN models of human pancreatic islet epigenomic features. Where indicated, the original raw data was reprocessed with the default setting of either the ATAC-seq/DNase-seq pipeline (available from: https://github.com/kundajelab/atac_dnase_pipelines), or the AQUAS TF and histone ChIP-seq pipeline (available from: https://github.com/kundajelab/chipseq_pipeline), using the human genome GRCh37 as reference. (STable 2) Tested sets of CNN hyperparameters. Convolutional neural networks with each set of hyperparameters differing in numbers and sizes of convolutional filters were trained 100 times, for a total of 1000 CNNs trained. (STable3) Full list of transcription factor binding motifs with <5% FDR sequence match to motifs activating convolutional filters from the first layers of the 1000 CNN ensemble. No motif redundancy removal was applied here. (STable 4) CNN regulatory predictions at 28 T2D association signals fine-mapped to a single most likely causal variant with genetic PPA (gPPA) > = 0.80 or functional PPA (fPPA) > = 0.80. (STable 5) CNN regulatory predictions at signals with at least two variants with functional PPAs (fPPAs) > = 0.2. These are the signals where incorporating CNN predictions downstream of fine-mapping can yield the largest benefits. The table lists all the variants with fPPA > = 0.05 at these signals, together with their CNN q-value (lowest_Q), and the corresponding top scoring CNN feature and the mean predicted score difference across the 1000 trained models. (STable 6) Primer sequences used for cloning of the Prox1 enhancer. Prox1_enhancer_Forward (Reverse)_internal were designed for sequence validation. Restriction enzymes NheI and XhoI were used for all subsequent cloning. SDM = site directed mutagenesis. [file elife-51503-supp1.xlsx]

## Sheet: STable 1
STable 1. Summary of publicly available datasets used to train the CNN models of human pancreatic islet epigenomic features.
Where indicated, the original raw data was reprocessed with the default setting of either the ATAC-seq/DNase-seq pipeline (available from: https://github.com/kundajelab/atac_dnase_pipelines), or the AQUAS TF and histone ChIP-seq pipeline (available from: https://github.com/kundajelab/chipseq_pipeline), using the human genome GRCh37 as reference.
Feature	Source	Data type	Tissue	Data re-processing	Peak count
ATAC	Thurner et. al. 2018	ATAC-seq	Human pancreatic islets	ATAC-seq/DNaseq-seq pipeline	140765
aci_ATAC	Ackermann et al. 2016	ATAC-seq	FACS-sorted acinar cells from human pancreatic islets	ATAC-seq/DNaseq-seq pipeline	84062
a_ATAC	Ackermann et al. 2016	ATAC-seq	FACS-sorted alpha cells from human pancreatic islets	ATAC-seq/DNaseq-seq pipeline	172331
b_ATAC	Ackermann et al. 2016	ATAC-seq	FACS-sorted beta cells from human pancreatic islets	ATAC-seq/DNaseq-seq pipeline	117943
CTCF	Pasquali et al. 2013	ChIP-seq	Human pancreatic islets	AQUAS ChIP-seq pipeline	38607
DNase	ENCODE	DNase-seq	Human pancreatic islets	None; raw data not available	92255
FOXA2	Pasquali et al. 2013	ChIP-seq	Human pancreatic islets	AQUAS ChIP-seq pipeline	57848
H2A.Z	Pasquali et al. 2013	ChIP-seq	Human pancreatic islets	AQUAS ChIP-seq pipeline	163194
H2K4me1	Bhandare et al. 2010	ChIP-seq	Human pancreatic islets	AQUAS ChIP-seq pipeline	10059
H2K4me2	Bhandare et al. 2010	ChIP-seq	Human pancreatic islets	AQUAS ChIP-seq pipeline	11421
H3K27ac	Roadmap Epigenomics	ChIP-seq	Human pancreatic islets	AQUAS ChIP-seq pipeline	64698
H3K27me3	Roadmap Epigenomics	ChIP-seq	Human pancreatic islets	AQUAS ChIP-seq pipeline	9594
a_H3K27me3	Bramswig et al. 2013	ChIP-seq	FACS-sorted alpha cells from human pancreatic islets	AQUAS ChIP-seq pipeline	77234
b_H3K27me3	Bramswig et al. 2013	ChIP-seq	FACS-sorted beta cells from human pancreatic islets	AQUAS ChIP-seq pipeline	28350
e_H3K27me3	Bramswig et al. 2013	ChIP-seq	FACS-sorted exocrine cells from human pancreatic islets	AQUAS ChIP-seq pipeline	47184
H3K36me3	Roadmap Epigenomics	ChIP-seq	Human pancreatic islets	AQUAS ChIP-seq pipeline	58104
H3K4me1	Roadmap Epigenomics	ChIP-seq	Human pancreatic islets	AQUAS ChIP-seq pipeline	27341
H3K4me3	Roadmap Epigenomics	ChIP-seq	Human pancreatic islets	AQUAS ChIP-seq pipeline	21683
a_H3K4me3	Bramswig et al. 2013	ChIP-seq	FACS-sorted cells alpha from human pancreatic islets	AQUAS ChIP-seq pipeline	27440
b_H3K4me3	Bramswig et al. 2013	ChIP-seq	FACS-sorted beta cells from human pancreatic islets	AQUAS ChIP-seq pipeline	26065
e_H3K4me3	Bramswig et al. 2013	ChIP-seq	FACS-sorted exocrine cells from human pancreatic islets	AQUAS ChIP-seq pipeline	25556
H3K79me2	Stitzel et al. 2010	ChIP-seq	Human pancreatic islets	AQUAS ChIP-seq pipeline	118678
H3K9me3	Roadmap Epigenomics	ChIP-seq	Human pancreatic islets	AQUAS ChIP-seq pipeline	13186
H3K9ac	Roadmap Epigenomics	ChIP-seq	Human pancreatic islets	AQUAS ChIP-seq pipeline	62373
LMR	Thurner et. al. 2018	WGBS	Human pancreatic islets	None	37122
MAFB	Pasquali et al. 2013	ChIP-seq	Human pancreatic islets	AQUAS ChIP-seq pipeline	18612
NKX2.2	Pasquali et al. 2013	ChIP-seq	Human pancreatic islets	AQUAS ChIP-seq pipeline	55358
NKX6.1	Pasquali et al. 2013	ChIP-seq	Human pancreatic islets	AQUAS ChIP-seq pipeline	22697
PDX1	Pasquali et al. 2013	ChIP-seq	Human pancreatic islets	AQUAS ChIP-seq pipeline	32975
UMR	Thurner et. al. 2018	WGBS	Human pancreatic islets	None	13637

## Sheet: STable 2
STable 2. Tested sets of CNN hyperparameters. Convolutional neural networks with each set of hyperparameters differing in numbers and sizes of convolutional filters were trained 100 times, for a total of 1000 CNNs trained.
Parameter	Layer	set 1	set 2	set 3	set 4	set 5	set 6	set 7	set 8	set 9	set 10
Convolutional filters	1st	320	320	320	320	320	320	320	320	320	320
	2nd	480	480	480	320	320	320	320	260	260	260
	3rd	960	960	960	320	320	320	320	200	200	200
Convolutional filter sizes	1st	7	9	11	13	15	17	19	21	23	25
	2nd	7	9	9	9	11	13	13	13	15	15
	3rd	7	7	7	7	7	7	7	7	7	7
Pooling width	1st	3	3	3	3	3	3	3	3	3	3
	2nd	4	4	4	4	4	4	4	4	4	4
	3rd	4	4	4	4	4	4	4	4	4	4
Hidden layer units	1st	1000	1000	1000	1000	1000	1000	1000	1000	1000	1000
	2nd	1000	1000	1000	1000	1000	1000	1000	1000	1000	1000
Hidden layer dropouts	1st	0.5	0.5	0.5	0.5	0.5	0.5	0.5	0.5	0.5	0.5
	2nd	0.5	0.5	0.5	0.5	0.5	0.5	0.5	0.5	0.5	0.5
Learning rate	-	0.01	0.01	0.01	0.01	0.01	0.01	0.01	0.01	0.01	0.01
Momentum	-	0.9	0.9	0.9	0.9	0.9	0.9	0.9	0.9	0.9	0.9
Optimization	-	adam	adam	adam	adam	adam	adam	adam	adam	adam	adam

## Sheet: STable 3
STable3. Full list of transcription factor binding motifs with <5% FDR sequence match to motifs activating convolutional filters from the first layers of the 1000 CNN ensemble. No motif redundancy removal was applied here.
# CNNs at q<0.05	motif	TF
838	M6114_1.02	FOXA1
833	M4427_1.02	CTCF
811	M6234_1.02	FOXA3
755	M6241_1.02	FOXJ2
753	M4612_1.02	CTCFL
741	M4567_1.02	FOXA2
736	M0737_1.02	FOXB2
699	M0747_1.02	FOXL2
679	M5446_1.02	FOXD4L4
677	M1906_1.02	SP1
664	M6239_1.02	FOXF2
663	M5460_1.02	FOXL1
657	M2314_1.02	SP2
647	M0728_1.02	FOXJ1
646	M6482_1.02	SP3
629	M2296_1.02	MAFK
597	M6235_1.02	FOXC1
596	M4629_1.02	NFE2
591	M6237_1.02	FOXD3
574	M6238_1.02	FOXF1
571	M2292_1.02	JUND
557	M4623_1.02	JUNB
556	M1528_1.02	RFX6
555	M6535_1.02	WT1
555	M5593_1.02	KLF16
547	M2392_1.02	RFX2
547	M2278_1.02	FOS
546	M4619_1.02	FOSL1
546	M2283_1.02	FOXP1
544	M6360_1.02	NFE2L2
541	M4572_1.02	MAFF
541	M4459_1.02	EGR1
538	M5209_1.02	SP5
535	M0718_1.02	FOXK1
534	M4681_1.02	BACH2
530	M4640_1.02	ZBTB7A
530	M2385_1.02	FOXP2
526	M5587_1.02	JDP2
526	M4565_1.02	FOSL2
522	M2391_1.02	KLF5
521	M5689_1.02	NRL
516	M4526_1.02	SMARCC1
510	M6228_1.02	FOSB
509	M5592_1.02	KLF14
508	M4476_1.02	RFX5
507	M0719_1.02	FOXG1
491	M0736_1.02	FOXK2
490	M6539_1.02	ZBTB7B
488	M1529_1.02	RFX7
484	M1970_1.02	NFIC
480	M6325_1.02	KLF6
478	M5856_1.02	SP8
461	M6552_1.02	ZNF148
450	M5977_1.02	ZNF740
449	M0756_1.02	FOXN3
448	M6246_1.02	FOXO3
446	M6336_1.02	MAZ
446	M1863_1.02	FOXD1
442	M2277_1.02	FLI1
436	M6123_1.02	ZNF281
429	M6324_1.02	KLF4
426	M6222_1.02	ETV4
422	M6247_1.02	FOXO4
419	M6422_1.02	PLAGL1
418	M6281_1.02	HNF1A
416	M0436_1.02	ZNF35
409	M0405_1.02	KLF7
408	M1882_1.02	IRF1
406	M6306_1.02	INSM1
403	M2275_1.02	ELF1
400	M6453_1.02	RFX3
400	M6245_1.02	FOXO1
396	M4452_1.02	BATF
395	M6553_1.02	ZNF219
395	M5777_1.02	RFX4
394	M6483_1.02	SP4
392	M6440_1.02	PRRX2
390	M4344_1.02	ARID2
388	M5944_1.02	VAX1
388	M1871_1.02	KLF2
386	M0443_1.02	KLF12
377	M5771_1.02	RAX
376	M0900_1.02	SHOX
374	M6250_1.02	FOXQ1
374	M5602_1.02	LHX9
374	M0104_1.02	ARID3B
372	M5398_1.02	ERF
370	M6207_1.02	ELK1
370	M5541_1.02	HOXB2
367	M6282_1.02	HNF1B
367	M5420_1.02	ETV1
366	M5624_1.02	MEOX2
365	M5807_1.02	SHOX2
365	M5772_1.02	RAX2
365	M5664_1.02	NFIX
363	M6243_1.02	FOXN2
362	M5635_1.02	MNX1
361	M6451_1.02	RFX1
361	M0896_1.02	VENTX
360	M5945_1.02	VAX2
360	M0943_1.02	OTP
359	M0975_1.02	LHX1
358	M5542_1.02	HOXB3
358	M5394_1.02	EN2
357	M5503_1.02	GSX2
357	M1581_1.02	CIC
353	M6204_1.02	ELF2
353	M5543_1.02	HOXB5
350	M6208_1.02	ELK3
349	M5502_1.02	GSX1
349	M0931_1.02	LHX5
348	M5604_1.02	LMX1A
347	M5631_1.02	MIXL1
347	M5605_1.02	LMX1B
346	M0894_1.02	LBX1
345	M6226_1.02	FEV
343	M6224_1.02	ETV7
343	M0999_1.02	NKX6-1
342	M6380_1.02	NOBOX
342	M5422_1.02	ETV3
341	M4462_1.02	GABPA
339	M1163_1.02	NKX6-3
339	M0178_1.02	ASCL2
338	M6140_1.02	AIRE
338	M0949_1.02	AC012531.1
336	M6332_1.02	MAF
335	M6329_1.02	LHX3
334	M6313_1.02	IRF8
334	M1071_1.02	HOXD3
334	M1039_1.02	ENSG00000229544
331	M5481_1.02	GBX2
331	M5284_1.02	ALX3
331	M0905_1.02	HOXA4
329	M5445_1.02	FOXD2
328	M6358_1.02	NEUROD1
328	M1027_1.02	HOXA6
326	M1125_1.02	NKX1-1
326	M1072_1.02	HOXA3
325	M0906_1.02	VTN
325	M0714_1.02	ENSG00000235187
323	M5414_1.02	ESX1
320	M6546_1.02	ZFHX3
319	M5390_1.02	EN1
319	M5343_1.02	DLX5
317	M5348_1.02	DRGX
316	M6205_1.02	ELF3
316	M0958_1.02	LHX4
315	M6442_1.02	PURA
315	M5949_1.02	VSX1
313	M5637_1.02	MSX1
313	M1012_1.02	HOXB4
311	M4604_1.02	ZNF263
309	M0892_1.02	EMX1
308	M5344_1.02	DLX6
308	M4522_1.02	ELK4
308	M1070_1.02	HOXC5
307	M1582_1.02	HMG20B
305	M5342_1.02	DLX4
304	M6308_1.02	IRF2
301	M6516_1.02	TCF3
301	M6223_1.02	ETV5
300	M2264_1.02	ATOH1
291	M0893_1.02	ZFHX2
288	M5672_1.02	NOTO
288	M2390_1.02	EHF
287	M5563_1.02	HOXD8
285	M2307_1.02	PRDM1
283	M6206_1.02	ELF5
283	M5865_1.02	SPIC
283	M4545_1.02	ZNF683
281	M5377_1.02	ELF4
281	M5335_1.02	CUX2
279	M5116_1.02	ATOH8
278	M5623_1.02	MEOX1
277	M5480_1.02	GBX1
277	M5425_1.02	ETV6
277	M0214_1.02	TCF21
275	M6500_1.02	TAL1
275	M6201_1.02	EGR4
275	M5584_1.02	ISX
273	M0969_1.02	LHX8
272	M5714_1.02	PHOX2A
270	M6438_1.02	PROP1
270	M6157_1.02	BARX2
269	M6415_1.02	PDX1
267	M4971_1.02	FERD3L
266	M5591_1.02	KLF13
266	M5388_1.02	EMX2
265	M5715_1.02	PHOX2B
265	M2299_1.02	MYF5
264	M6242_1.02	FOXJ3
263	M6468_1.02	SNAI1
263	M1025_1.02	HOXD1
259	M6244_1.02	FOXM1
259	M5310_1.02	BSX
258	M6303_1.02	HOXD4
258	M0300_1.02	ATF2
256	M6221_1.02	ETS2
256	M6189_1.02	DLX3
256	M6119_1.02	SPI1
256	M5636_1.02	MSC
254	M6354_1.02	MYOD1
252	M5705_1.02	PAX4
250	M5291_1.02	ARX
249	M6188_1.02	DLX2
249	M5421_1.02	ETV2
246	M5740_1.02	POU4F1
245	M6285_1.02	ONECUT1
244	M6355_1.02	MYOG
236	M0890_1.02	LHX6
235	M6213_1.02	ERG
233	M5743_1.02	POU4F3
231	M5518_1.02	HMX1
230	M6199_1.02	EGR2
229	M4708_1.02	TBP
229	M4463_1.02	IRF4
229	M4453_1.02	BCL11A
224	M5941_1.02	UNCX
223	M0891_1.02	TLX2
222	M6534_1.02	VSX2
222	M0422_1.02	ZIC5
221	M5339_1.02	DLX1
218	M1018_1.02	HLX
216	M6410_1.02	PAX6
215	M6322_1.02	KLF1
212	M4479_1.02	TCF12
212	M1034_1.02	DBX2
211	M5520_1.02	HMX3
211	M5428_1.02	EVX2
209	M5693_1.02	OLIG3
209	M4850_1.02	TCF15
206	M1884_1.02	MEF2A
206	M0217_1.02	NEUROG1
205	M5660_1.02	NFIA
204	M6141_1.02	ALX1
203	M6331_1.02	MAFB
203	M5287_1.02	ALX4
200	M5652_1.02	NEUROD2
199	M6277_1.02	HLF
199	M5308_1.02	BHLHE23
196	M6342_1.02	MEF2D
196	M5471_1.02	FOXO6
194	M5616_1.02	MEF2B
192	M5691_1.02	OLIG2
191	M5427_1.02	EVX1
190	M6147_1.02	ARID3A
189	M5965_1.02	ZIC4
188	M6347_1.02	MSX2
188	M5583_1.02	ISL2
185	M6328_1.02	LHX2
184	M6513_1.02	TFAP4
184	M6292_1.02	HOXA5
181	M5690_1.02	OLIG1
181	M5519_1.02	HMX2
180	M6527_1.02	TWIST1
180	M4467_1.02	MEF2C
173	M6312_1.02	IRF7
173	M5934_1.02	TGIF2
173	M5430_1.02	FIGLA
168	M6321_1.02	KLF15
165	M5998_1.02	CREB5
164	M5662_1.02	NFIB
164	M4635_1.02	STAT2
160	M5307_1.02	BHLHE22
159	M6490_1.02	SRY
155	M6353_1.02	MYF6
154	M6304_1.02	HOXD9
154	M5493_1.02	GMEB2
153	M6356_1.02	MZF1
151	M6251_1.02	FUBP1
151	M5490_1.02	GLIS1
150	M6485_1.02	SPIB
150	M6309_1.02	IRF3
149	M5491_1.02	GLIS2
148	M5304_1.02	BHLHA15
147	M5935_1.02	TGIF2LX
147	M5746_1.02	POU6F2
146	M0105_1.02	ARID3C
144	M5653_1.02	NEUROG2
143	M6267_1.02	GLIS3
142	M6368_1.02	NFIL3
141	M2289_1.02	JUN
139	M6236_1.02	FOXC2
137	M5293_1.02	ATF7
136	M0404_1.02	ZNF202
131	M0437_1.02	ZNF32
131	M0177_1.02	TWIST2
130	M5750_1.02	PRDM4
130	M1030_1.02	NKX2-3
129	M6554_1.02	ZNF238
129	M6427_1.02	POU4F2
127	M5804_1.02	SCRT1
125	M4471_1.02	PAX5
123	M6441_1.02	PTF1A
121	M6378_1.02	NKX3-1
119	M6344_1.02	MEIS2
119	M6171_1.02	CEBPD
119	M5697_1.02	ONECUT3
118	M6186_1.02	DBP
117	M5805_1.02	SCRT2
114	M0961_1.02	BARHL1
114	M0887_1.02	HOXA2
113	M5300_1.02	BARX1
111	M5594_1.02	LBX2
111	M5302_1.02	BATF3
110	M5323_1.02	CREB3
109	M6297_1.02	HOXB7
108	M5735_1.02	POU3F3
105	M1281_1.02	NAIF1
102	M6445_1.02	RARB
102	M6298_1.02	HOXB8
99	M6333_1.02	MAFG
99	M6180_1.02	CREB1
96	M6270_1.02	NHLH1
93	M6399_1.02	ONECUT2
89	M6323_1.02	KLF3
87	M2273_1.02	E2F6
86	M6510_1.02	TEF
86	M1928_1.02	NFKB1
85	M6301_1.02	HOXD10
84	M4461_1.02	ETS1
84	M0898_1.02	ZHX1
83	M4511_1.02	RXRA
82	M1955_1.02	STAT1
81	M6448_1.02	RELB
81	M6443_1.02	RARA
80	M4478_1.02	STAT3
79	M6152_1.02	ATF1
78	M6456_1.02	RREB1
78	M0398_1.02	ZSCAN10
75	M1157_1.02	HOXB9
74	M0216_1.02	NHLH2
73	M1919_1.02	YY1
72	M5322_1.02	CPEB1
71	M6375_1.02	NKX2-2
71	M6172_1.02	CEBPE
71	M5702_1.02	PAX1
71	M0607_1.02	KDM2B
68	M6359_1.02	NFE2L1
68	M5325_1.02	CREB3L1
68	M4527_1.02	SMARCC2
67	M6423_1.02	POU2F1
66	M6492_1.02	STAT5B
65	M2303_1.02	NR2C2
64	M6532_1.02	VDR
63	M1432_1.02	NR2E1
62	M5744_1.02	POU5F1B
62	M5711_1.02	PAX9
62	M5709_1.02	PAX7
62	M2268_1.02	CEBPB
61	M6314_1.02	IRF9
60	M6461_1.02	RXRB
60	M6430_1.02	PPARA
60	M5729_1.02	POU2F3
60	M5551_1.02	HOXC12
60	M1889_1.02	MAX
58	M6389_1.02	NR2C1
57	M6544_1.02	HIVEP1
57	M6381_1.02	NR0B1
57	M4484_1.02	ZNF143
56	M4444_1.02	RELA
55	M6491_1.02	STAT5A
55	M6455_1.02	RORC
55	M5571_1.02	ID4
55	M5292_1.02	ATF4
54	M1507_1.02	LCOR
53	M6497_1.02	STAT6
53	M5557_1.02	HOXD12
52	M6387_1.02	NR1I3
52	M6357_1.02	NANOG
52	M6181_1.02	CREM
52	M5738_1.02	POU3F4
50	M4636_1.02	THAP1

## Sheet: STable 4
STable 4. CNN regulatory predictions at 28 T2D association signals fine-mapped to a single most likely causal variant with genetic PPA (gPPA) >=0.80 or functional PPA (fPPA) >= 0.80.
variant	Allele	GWAS locus	gPPA	fPPA	ChromHMM	lowest_Q	Top CNN feature	Mean CNN prediction
rs34584161	A/G	RNF6	0.67155	0.898201	OSE	1.22437e-114	b_ATAC	-0.215
rs10830963	C/G	MTNR1B	1	1	CSE	8.6421e-40	LMR	0.064
rs917195	C/T	CRHR2	0.96192	0.986918	OWE	1.23915e-33	NKX2.2	0.1
rs191830490	G/A	FAM57B	0.51936	0.956026	OSE	4.508e-27	e_H3K4me3	-0.01
rs11257655	C/T	CDC123/CAMK1D	1	1	OSE	4.20987e-18	NKX6.1	0.047
rs80102379	G/T	KCNQ1_4	0.67619	0.892313	OWE	1.78011e-14	MAFB	-0.061
rs7732130	G/A	ZBED3	0.27609	0.833871	OSE	6.20663e-13	NKX6.1	-0.04
rs348330	G/A	ABCB10	0.99999	1	OSE	3.08514e-10	NKX6.1	0.047
rs7903146	C/T	TCF7L2	0.59196	0.970514	OSE	1.26439e-09	NKX6.1	0.034
rs963740	A/T	DLEU1	0.50268	0.878638	OSE	1.66962e-09	NKX6.1	0.034
rs13266634	C/T	SLC30A8	0.35121	0.961038	OSE	3.60536e-09	NKX6.1	0.034
rs76549217	C/T	ANKH_5	0.99977	0.999969	OSE	1.05018e-08	PDX1	-0.045
rs41277236	C/T	NEUROG3_4	0.73714	0.987024	WP	2.29218e-08	H3K4me3	-0.016
rs878521	G/A	GCK	0.9844	0.996673	OSE	1.41125e-07	H2K4me1	-0.005
rs560716466	G/A	EYA2_2	0.39569	0.890047	AP	2.1441e-07	H2K4me2	0.007
rs10974438	A/C	GLIS3	0.97343	0.884597	CSE	2.79059e-07	H3K79me2	0.077
rs6885132	C/G	ANKH_4	0.68236	0.94617	OSE	3.07072e-05	H3K27ac	-0.023
rs17168486	C/T	DGKB_2	0.57723	0.898145	WP	6.33234e-05	H3K9ac	-0.018
rs2066827	T/G	CDKN1B	0.9841	0.999177	AP	0.000141555	H3K4me3	0.012
rs12454712	T/C	BCL2A	1	0.999999	LMWE	0.00060937	b_H3K27me3	-0.017
rs13262861	C/G	ANK1	0.97279	0.98795	AP	0.000905549	H3K4me3	-0.011
rs199795270	G/C	FAM57B_2	0.66105	0.993381	AP	0.00265812	b_H3K4me3	-0.011
rs2925979	T/C	CMIP	0.96042	0.931498	CWE	0.00583799	b_H3K27me3	0.015
rs231361	G/A	KCNQ1_6	1	0.999999	CSE	0.00922744	NKX2.2	0.03
rs429358	T/C	TOMM40/APOE	0.89583	0.972849	HET	0.0108603	a_H3K4me3	0.01
rs2307111	T/C	POC5	0.62752	0.872547	E14	0.0274741	a_ATAC	-0.057
rs62271373	T/A	TSC22D2	0.94777	0.846372	HET	0.0307938	b_ATAC	0.033
rs2796441	G/A	TLE1	0.82394	0.94613	LMWE	0.0386324	b_ATAC	-0.033

## Sheet: STable 5
STable 5. CNN regulatory predictions at signals with at least 2 variants with functional PPAs (fPPAs)>=0.2. These are the signals where incorporating CNN predictions downstream of fine-mapping can yield the largest benefits. The table lists all the variants with fPPA>=0.05 at these signals, together with their CNN q-value (lowest_Q), and the corresponding top scoring CNN feature and the mean pred…
locus	variant	lowest_Q	gPPA	fPPA	ChromHMM	top_CNN_feature	CNN_score_diff
ABO_rs505922_Known_1	rs529565	6.84806e-11	0.12518	0.264457	PR	H2K4me1	0.0060578
ABO_rs505922_Known_1	rs505922	0.99999	0.17057	0.369932	PR	H3K4me1	-0.00293095
ANKRD55_rs96844_Known_4	rs33320	2.77547e-26	0.15549	0.394425	AP	H2K4me2	-0.0125975
ANKRD55_rs96844_Known_4	rs252924	2.23858e-05	0.11706	0.294995	AP	H2K4me2	0.00584729
ANKRD55_rs96844_Known_4	rs2591960	0.99999	0.15122	0.118569	TE	H3K4me1	-8.7156e-06
ARL15_rs62370480_Known_2	rs55744247	3.50993e-06	0.15214	0.387435	AP	H3K4me3	-0.0136394
ARL15_rs62370480_Known_2	rs62370480	0.99999	0.20266	0.519971	AP	H3K4me1	-0.000380555
ATP1B2_rs1641523_Novel_1	rs1624085	0.00499382	0.22494	0.386665	AP	H3K27ac	-0.0176758
ATP1B2_rs1641523_Novel_1	rs1642762	0.99999	0.32117	0.551991	AP	H3K4me1	0.000405863
ATP1B2_rs62059712_Novel_2	rs62059712	2.12795e-35	0.34209	0.459585	AP	H3K4me3	0.031191
ATP1B2_rs62059712_Novel_2	rs7503751	2.90829e-05	0.31552	0.42081	AP	Alpha_H3K4me3	-0.0142338
CDKN2A/B_rs10811660_Known_1	rs10811660	1e-250	0.47185	0.524135	OWE	MAFB	-0.357566
CDKN2A/B_rs10811660_Known_1	rs10811661	0.99999	0.40521	0.449888	OWE	H3K4me1	0.000801553
DGKB_rs10228066_Known_1	rs2191349	9.79832e-128	0.058339	0.157394	OSE	NKX6.1	0.121402
DGKB_rs10228066_Known_1	rs10258074	5.88766e-11	0.081641	0.220273	OSE	NKX6.1	-0.0365741
DGKB_rs10228066_Known_1	rs10228796	0.0616416	0.081641	0.220273	OSE	NKX6.1	0.0163818
DGKB_rs10228066_Known_1	rs2191348	0.0757744	0.081399	0.21954	OSE	NKX6.1	0.0160492
ETS1_rs67232546_Novel_1	rs11819995	0.00911629	0.27292	0.404195	WP	H3K9ac	-0.0140114
ETS1_rs67232546_Novel_1	rs11820002	0.632091	0.29701	0.439869	WP	Beta_H3K27me3	0.00861215
ETS1_rs67232546_Novel_1	rs11221333	0.99999	0.23965	0.0824028	GE	H3K4me1	-0.000397206
FARSA_rs3111316_Novel_1	rs2242517	0.00996941	0.11637	0.229383	WP	H2K4me2	-0.00434456
FARSA_rs3111316_Novel_1	rs3111316	0.99999	0.32295	0.259307	TE	H3K4me1	0.000167003
FARSA_rs3111316_Novel_1	rs10419627	0.99999	0.14979	0.120359	TE	H3K4me1	4.09042e-05
FARSA_rs3111316_Novel_1	rs2900660	0.99999	0.12032	0.0551952	CSE	H3K4me1	0.00134824
FARSA_rs3111316_Novel_1	rs1049481	0.99999	0.078798	0.0560131	GE	H3K4me1	-0.00132607
FTO_rs78020297_Known_3	rs76036961	0.0272253	0.12331	0.14192	CSE	H3K4me1	0.0068439
FTO_rs78020297_Known_3	rs76488452	0.0374433	0.18324	0.211811	CWE	H3K4me1	0.00664815
FTO_rs78020297_Known_3	rs16952479	0.820546	0.12668	0.146391	CWE	H2A.Z	-0.0239469
FTO_rs78020297_Known_3	rs78020297	0.99999	0.21335	0.246807	CWE	H3K4me1	0.00242522
FTO_rs78020297_Known_3	rs117502563	0.99999	0.19162	0.136647	HET	H3K4me1	-0.000277826
FTO_rs78020297_Known_3	rs113735368	0.99999	0.077705	0.0557726	HET	H3K4me1	-3.54971e-05
FTO_rs78020297_Known_3	rs76062288	0.99999	0.075939	0.054184	HET	H3K4me1	-0.000874728
GPSM1_rs28505901_Known_1	rs28429551	0.000977319	0.14374	0.478788	OSE	NKX6.1	-0.0221
GPSM1_rs28505901_Known_1	rs28562046	0.99999	0.16871	0.363141	OSE	H3K4me1	2.31972e-05
HHEX/IDE_rs1112718_Known_3	rs10882106	0.000524281	0.035114	0.230448	OWE	H3K27ac	-0.0200474
HHEX/IDE_rs1112718_Known_3	rs1112718	0.99999	0.32154	0.313871	LMWE	H3K4me1	0.000341617
HHEX/IDE_rs1112718_Known_3	rs11187149	0.99999	0.065137	0.0747944	PR	H3K4me1	-0.000412058
HMG20A_rs1005752_Known_1	rs62007299	6.78748e-20	0.054547	0.281601	AP	H2K4me2	-0.0110115
HMG20A_rs1005752_Known_1	rs34591043	0.0929437	0.054547	0.266198	AP	H3K9ac	0.0107612
HMG20A_rs1005752_Known_1	rs952472	0.99999	0.039624	0.0597555	TE	H3K4me1	0.00173036
HMG20A_rs1005752_Known_1	rs952471	0.99999	0.039624	0.055856	TE	H3K4me1	0.000862731
HMGB1_rs11842871_Novel_1	rs2249825	1.1835e-13	0.14128	0.261284	WP	H2K4me2	-0.00919124
HMGB1_rs11842871_Novel_1	rs3742305	0.99999	0.16533	0.35247	GE	H3K4me1	-0.000115954
HMGB1_rs11842871_Novel_1	rs1056130	0.99999	0.08199	0.23966	AP	H3K4me1	0.000313416
HNF1B_rs10908278_Known_1	rs11263763	6.23398e-06	0.13334	0.52018	AP	H3K4me3	-0.0133802
HNF1B_rs10908278_Known_1	rs10908278	0.99999	0.71596	0.364346	CWE	H3K4me1	0.000454887
HNF1B_rs10908278_Known_1	rs11651755	0.99999	0.12698	0.0648332	CWE	H3K4me1	-0.000715572
IGF2BP3_rs78840640_Novel_2	rs78840640	5.42737e-113	0.32959	0.579303	OWE	MAFB	-0.165916
IGF2BP3_rs78840640_Novel_2	rs73281643	1.60684e-22	0.069757	0.289387	OSE	H3K4me1	-0.019999
IRS2_rs7987740_Novel_1	rs7333413	5.96798e-23	0.05498	0.289389	OSE	H3K27ac	-0.0448593
IRS2_rs7987740_Novel_1	rs7335249	0.99999	0.050622	0.266466	OSE	H3K4me1	0.000394002
IRS2_rs7987740_Novel_1	rs9515043	0.99999	0.042946	0.226103	OSE	H3K4me1	-3.94798e-05
KCNQ1_rs234853_Known_8	rs234852	6.63097e-07	0.22773	0.21228	HET	FOXA2	-0.107086
KCNQ1_rs234853_Known_8	rs234853	0.439676	0.49008	0.457124	HET	H2A.Z	-0.0286365
KCNQ1_rs234853_Known_8	rs234854	0.99999	0.25084	0.233968	HET	H3K4me1	0.0010785
KCNQ1_rs234853_Known_8	rs234866	0.99999	0.0027126	0.0570017	OSE	H3K4me1	-0.00200763
KL_rs576674_Known_1	rs488321	9.37549e-28	0.22583	0.274178	OWE	NKX6.1	0.0572807
KL_rs576674_Known_1	rs488166	1.04692e-14	0.20996	0.223508	OWE	NKX6.1	0.0420738
KL_rs576674_Known_1	rs576674	0.00416589	0.22583	0.272476	OWE	LMR	-0.0192913
KL_rs576674_Known_1	rs2858980	0.99999	0.16886	0.201098	OWE	H3K4me1	-0.00114338
KSR2_rs34965774_Novel_1	rs4766891	2.64004e-36	0.073283	0.0500401	HET	H2A.Z	-0.15907
KSR2_rs34965774_Novel_1	rs79310463	0.0106518	0.033872	0.250232	AP	H3K4me3	-0.00939516
KSR2_rs34965774_Novel_1	rs55834317	0.043951	0.036528	0.26961	AP	H2K4me2	0.00379038
KSR2_rs34965774_Novel_1	rs34965774	0.99999	0.3082	0.134715	HET	H3K4me1	-0.000293617
KSR2_rs34965774_Novel_1	rs7313918	0.99999	0.16768	0.0729889	HET	H3K4me1	0.000619955
KSR2_rs34965774_Novel_1	rs116861488	0.99999	0.10092	0.0685146	HET	H3K4me1	-0.000778222
KSR2_rs34965774_Novel_1	rs74855230	0.99999	0.099437	0.0675084	HET	H3K4me1	-0.000220979
MAP2K7_rs4804833_Novel_1	rs2115107	8.73436e-09	0.30834	0.647874	AP	UMR	-0.010923
MAP2K7_rs4804833_Novel_1	rs4804833	0.99999	0.52883	0.241745	CSE	H3K4me1	-0.00207138
MAP2K7_rs4804833_Novel_1	rs2303700	0.99999	0.094751	0.0836139	TE	H3K4me1	0.000435352
NEUROG3_rs61850200_Novel_3	rs34673046	1.83682e-07	0.031772	0.269361	OSE	H2K4me1	-0.00511579
NEUROG3_rs61850200_Novel_3	rs61849864	0.99999	0.035452	0.300375	OSE	H3K4me1	0.000381575
PABPC4L_rs1296328_Novel_1	rs1296328	1.11856e-211	0.29351	0.254577	LMR	FOXA2	-0.562291
PABPC4L_rs1296328_Novel_1	rs1724557	0.40247	0.24091	0.251503	LMR	H2A.Z	0.0291316
PABPC4L_rs1296328_Novel_1	rs1724556	0.99999	0.20368	0.228603	LMR	H3K4me1	0.000330567
PROX1_rs79687284_Known_2	rs17712208	1.68676e-160	0.35629	0.35668	OSE	H3K27ac	-0.115476
PROX1_rs79687284_Known_2	rs79687284	0.00267444	0.64371	0.64332	OSE	Alpha_H3K4me3	-0.0115056
PTPRS_rs116953931_Novel_2	rs61729778	7.45623e-14	0.13802	0.297185	HET	H3K4me3	-0.0199653
PTPRS_rs116953931_Novel_2	rs116953931	0.99999	0.26163	0.11321	HET	H3K4me1	0.000742047
PTPRS_rs116953931_Novel_2	rs45439595	0.99999	0.13841	0.241378	TE	H3K4me1	-0.00122114
SHQ1_rs13085136_Novel_1	rs13080180	2.08026e-10	0.27074	0.427085	CWE	NKX6.1	0.0356127
SHQ1_rs13085136_Novel_1	rs13085136	0.99999	0.7107	0.482424	HET	H3K4me1	-0.00181278
SHQ1_rs13085136_Novel_1	rs13061060	0.99999	0.0085258	0.0570485	OWE	H3K4me1	-0.00163175
SLC12A8_rs649961_Novel_1	rs4679370	3.01449e-20	0.18604	0.230872	OSE	Beta_ATAC	-0.0920614
SLC12A8_rs649961_Novel_1	rs649961	3.21384e-14	0.2037	0.311832	OSE	NKX6.1	0.0413947
SLC12A8_rs649961_Novel_1	rs569255	0.99999	0.12742	0.24382	OSE	H3K4me1	-0.000797918
SLC7A7_rs17122772_Novel_1	rs17122782	7.89938e-09	0.23217	0.242613	AP	H3K9ac	0.0234868
SLC7A7_rs17122772_Novel_1	rs17122772	3.08698e-08	0.26872	0.277253	AP	Alpha_H3K4me3	-0.0175454
SLC7A7_rs17122772_Novel_1	rs17122779	0.00269364	0.24976	0.23861	AP	Alpha_H3K4me3	0.0111859
SLC7A7_rs17122772_Novel_1	rs17122776	0.609871	0.23217	0.239936	AP	Alpha_H3K4me3	0.0064906
SLCO6A1_rs138337556_Novel_1	rs77487268	0.0377493	0.2149	0.396539	HET	H2K4me2	-0.00391879
SLCO6A1_rs138337556_Novel_1	rs114546213	0.192347	0.63064	0.439562	LMR	H3K9me3	0.0178109
SLCO6A1_rs138337556_Novel_1	rs78162670	0.99999	0.15446	0.163899	LMR	H3K4me1	-0.000291066
TCEA2_rs59944054_Novel_1	rs80067828	0.000101726	0.070525	0.209519	AP	H2K4me2	0.00549944
TCEA2_rs59944054_Novel_1	rs73322872	0.99999	0.12308	0.365645	AP	H3K4me1	0.000288322
TCEA2_rs59944054_Novel_1	rs6010716	0.99999	0.019268	0.0579672	AP	H3K4me1	0.000266494
TCF7L2_rs34855922_Known_8	rs11196234	0.00183797	0.2096	0.212286	CWE	NKX6.1	0.0212707
TCF7L2_rs34855922_Known_8	rs34855922	0.0208743	0.78336	0.779299	CWE	NKX2.2	0.0285407
TM6SF2_rs8107974_Known_1	rs10401969	0.00260749	0.18341	0.0941764	GE	H3K9ac	0.0146541
TM6SF2_rs8107974_Known_1	rs58542926	0.0339315	0.13816	0.217253	HET	H2K4me1	-0.00291115
TM6SF2_rs8107974_Known_1	rs8107974	0.99999	0.43379	0.343968	GE	H3K4me1	-0.000180901
TM6SF2_rs8107974_Known_1	rs739846	0.99999	0.22255	0.30999	TE	H3K4me1	-0.000830628
TMEM154_rs7669833_Known_1	rs6813195	0.00156233	0.084668	0.430447	OSE	LMR	-0.0204662
TMEM154_rs7669833_Known_1	rs7669833	0.99999	0.14705	0.299604	AP	H3K4me1	3.44071e-05
TMEM154_rs7669833_Known_1	rs7686797	0.99999	0.032129	0.0855507	AP	H3K4me1	-0.000541161
TMEM18_rs62107261_Known_1	rs62106258	3.92542e-05	0.35849	0.33865	LMR	MAFB	0.038295
TMEM18_rs62107261_Known_1	rs62107261	0.968711	0.62149	0.583829	LMR	Exocrine_H3K27me3	0.0129267
TMEM18_rs62107261_Known_1	rs62106252	0.99999	0.014941	0.0577172	PR	H3K4me1	-0.00213019
TP53INP1_rs10097617_Known_1	rs896853	2.65793e-11	0.14208	0.24045	AP	UMR	-0.012306
TP53INP1_rs10097617_Known_1	rs10097617	0.0126569	0.19771	0.334458	AP	UMR	0.00614302
TP53INP1_rs10097617_Known_1	rs2879813	0.99999	0.14208	0.240448	AP	H3K4me1	-2.18957e-05
ZMIZ1_rs703972_Known_1	rs703977	6.8718e-28	0.11279	0.219905	OSE	NKX6.1	-0.0574917
ZMIZ1_rs703972_Known_1	rs703980	3.29902e-08	0.094784	0.185032	OSE	H2K4me1	-0.00534836
ZMIZ1_rs703972_Known_1	rs703976	0.163338	0.1154	0.225127	OSE	H2K4me1	-0.00244945
ZMIZ1_rs703972_Known_1	rs810517	0.924587	0.026449	0.0516163	OSE	H3K9ac	0.00684158
ZMIZ1_rs703972_Known_1	rs703981	0.99999	0.094517	0.184414	OSE	H3K4me1	-0.00130798
ZNF169_rs12236906_Novel_2	rs10993329	1.24551e-15	0.026752	0.309983	AP	H3K4me3	0.0209112
ZNF169_rs12236906_Novel_2	rs12236906	0.99999	0.59155	0.32896	HET	H3K4me1	0.000353643
ZNF169_rs12236906_Novel_2	rs12344256	0.99999	0.026626	0.0694297	TE	H3K4me1	0.00243519

## Sheet: STable 6 
STable 6. Primer sequences used for cloning of the Prox1 enhancer. Prox1_enhancer_Forward (Reverse)_internal were designed for sequence validation. Restriction enzymes NheI and XhoI were used for all subsequent cloning. SDM= site-directed mutagenesis.
Primer	Sequence (5’ – 3’)
Prox1_enhancer_Forward	TGCTTTGATAGGAATGTGCGG
Prox1_enhancer_Reverse	TGAAGTAGCTCCCAGTGAAGG
Prox1_enhancer_Forward_internal	TGGGGTCTATGGCAGTCTGA
Prox1_enhancer_Reverse_internal	CTCTTATCTGGGGCAGCTGG
Prox1_rs17712208_SDM_Forward	TCCCTAATCAGTCAATAATTATCCATAGCTCCATTAACGATCC
Prox1_rs17712208_SDM_Reverse	GGATCGTTAATGGAGCTATGGATAATTATTGACTGATTAGGGA
Prox1_rs79687284_SDM_Forward	TGGATTCTCACCCAGGGGCATCACCAGAC
Prox1_rs79687284_SDM_Reverse	GTCTGGTGATGCCCCTGGGTGAGAATCCA
