# Supplementary figures and images for: Deep learning models predict regulatory variants in pancreatic islets and refine type 2 diabetes association signals
Source: eLife journal article supplement (doi:10.7554/elife.51503), 2020-01-27

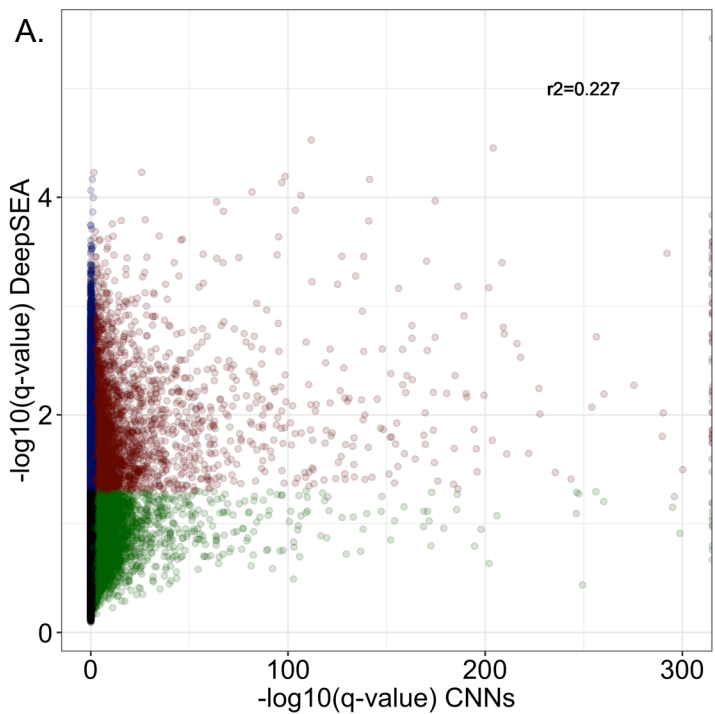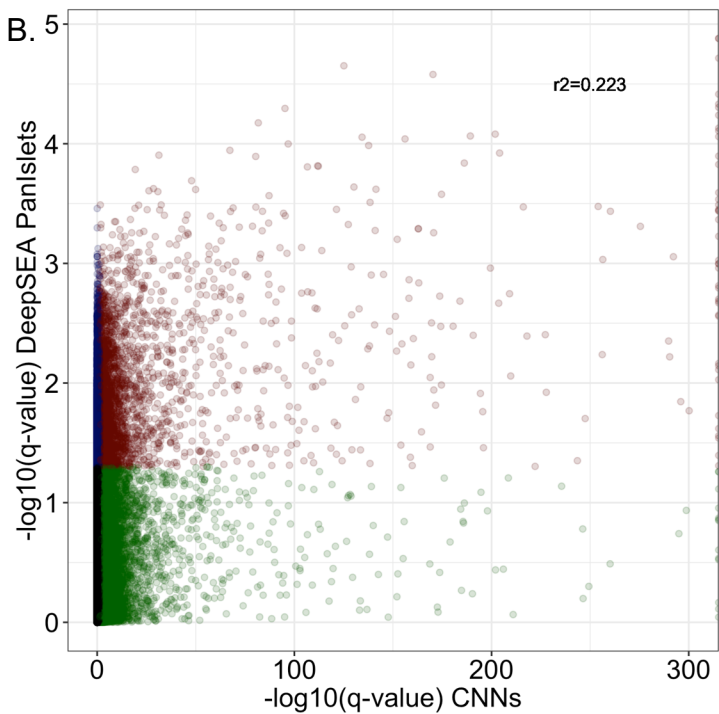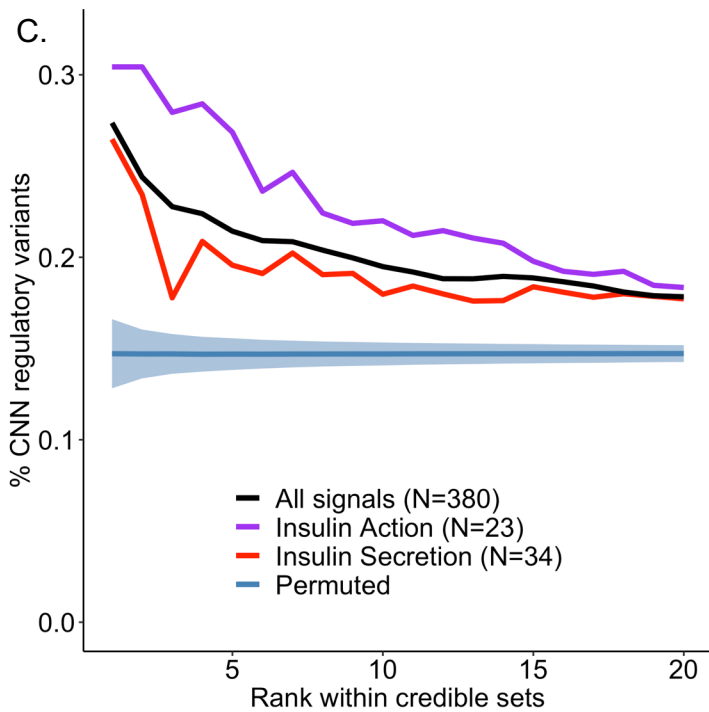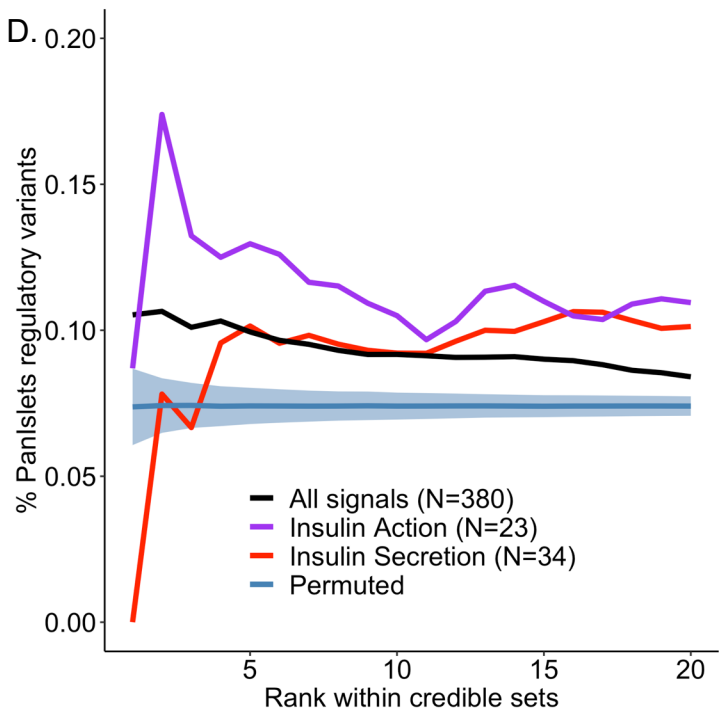

Supplement: supp [file elife-51503-supp-v1.zip]

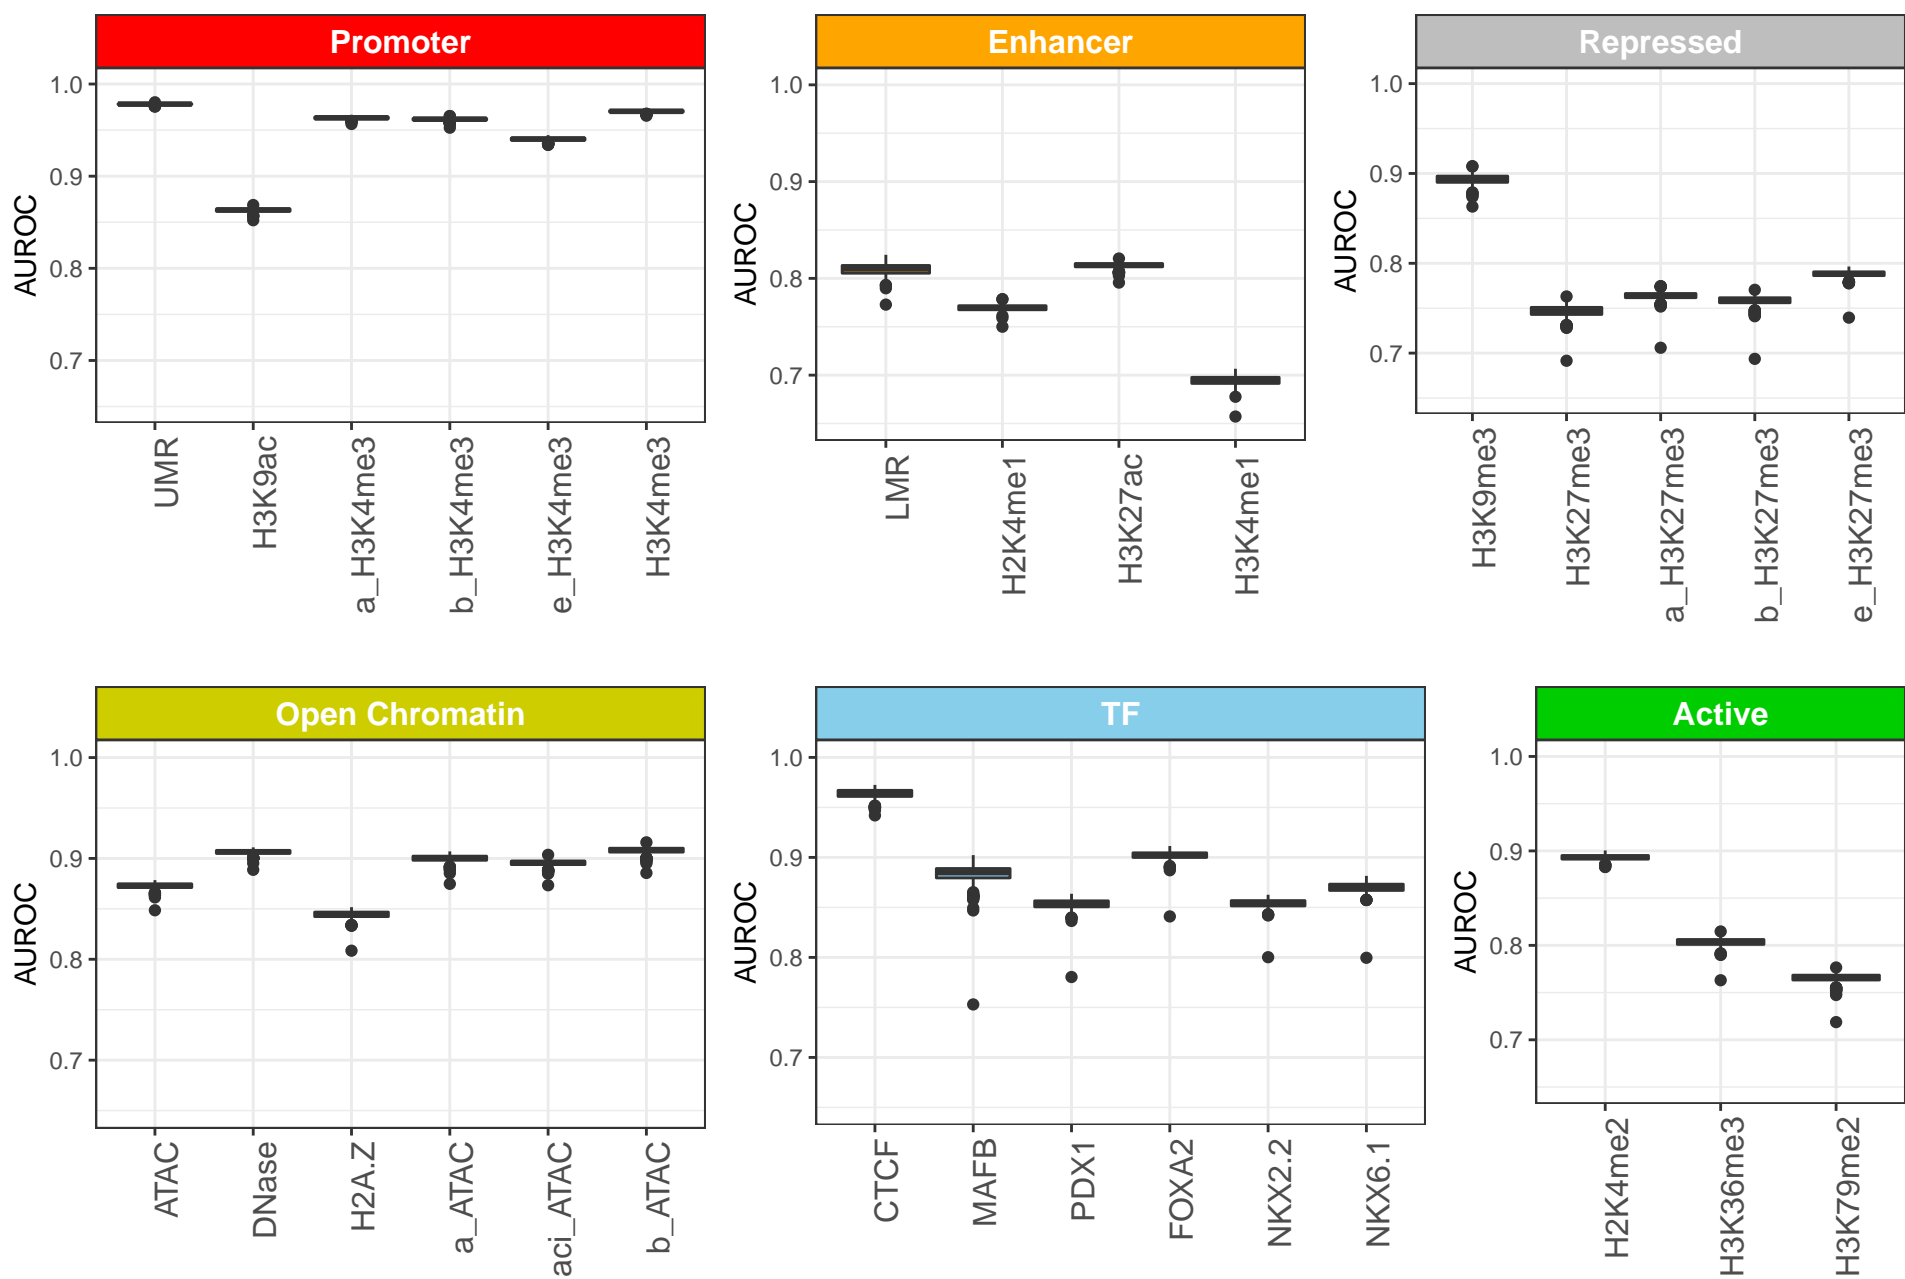

Supplement: supp [file elife-51503-supp-v1.zip]

CNN Filters

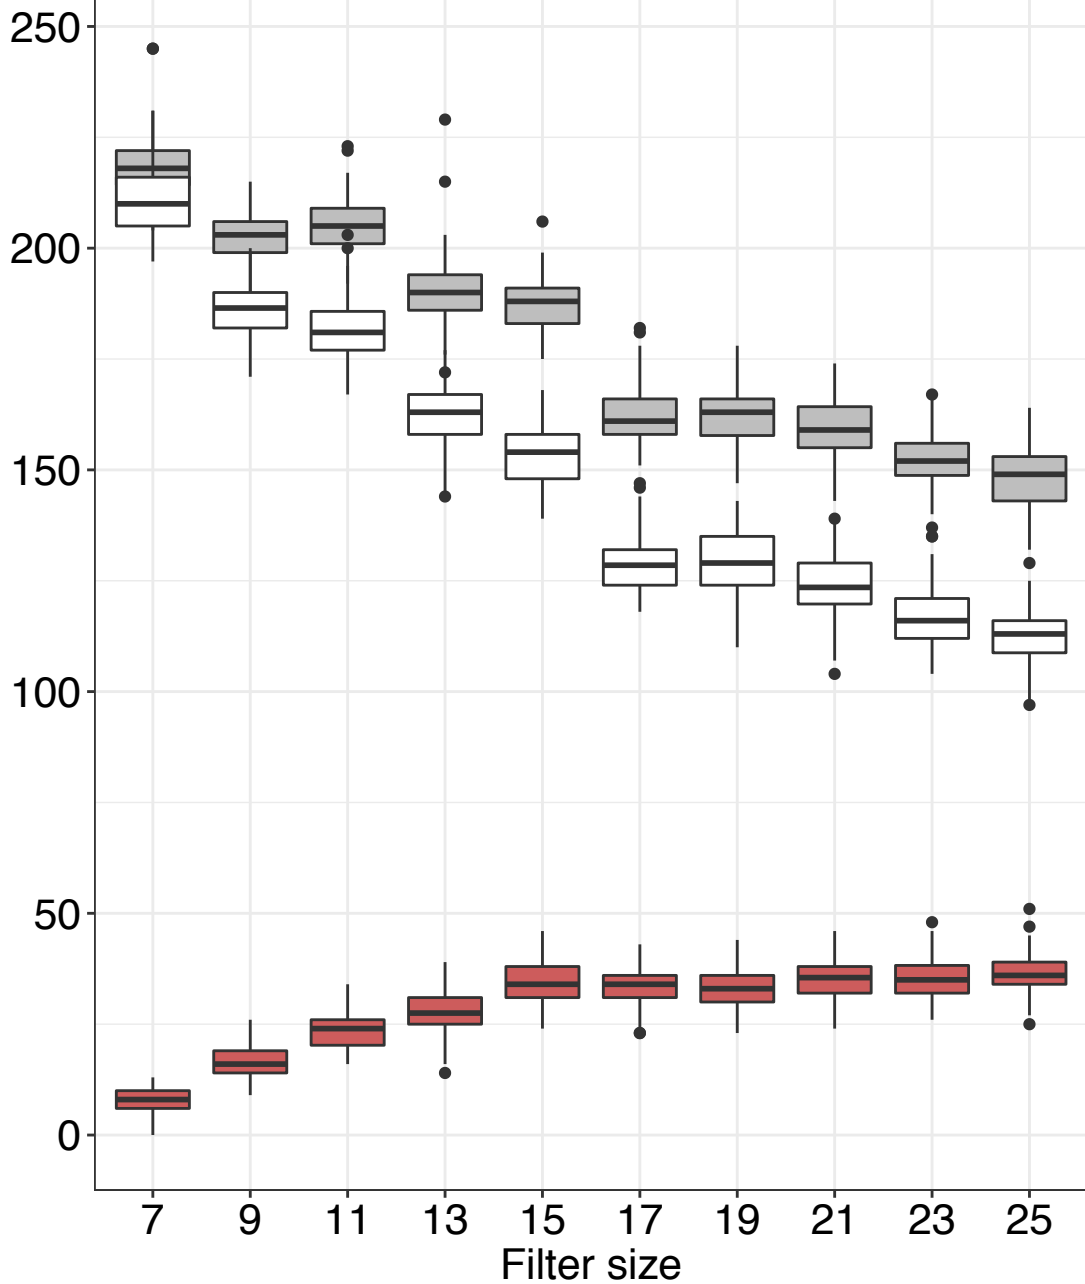

Filters

- Annotated
- Informative
- Informative
- Unannotated

Supplement: supp [file elife-51503-supp-v1.zip]
